# Supplementary material for: Programmed Cell Death-1/Programmed Cell Death-1 Ligand as Prognostic Markers of Coronavirus Disease 2019 Severity
Source: MDPI journal article supplement (doi:10.3390/cells11121978), 2022-06-20
Supplement: s1 [file s1]

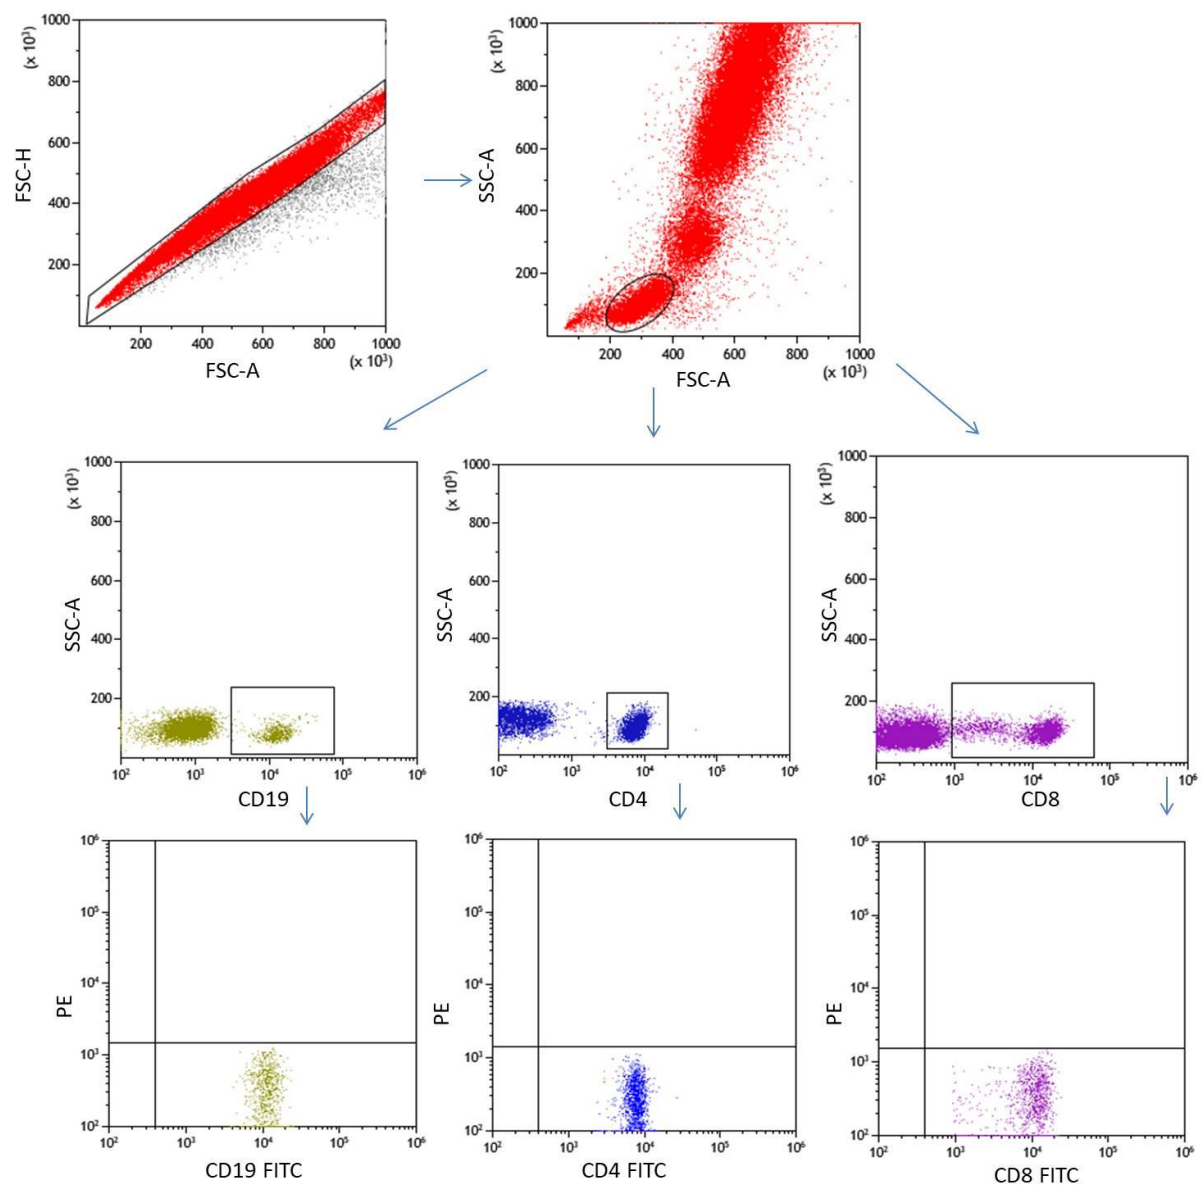

**Figure S1.** FMO control for cells stained with FITC and PE conjugated antibodies (PE - no stain).

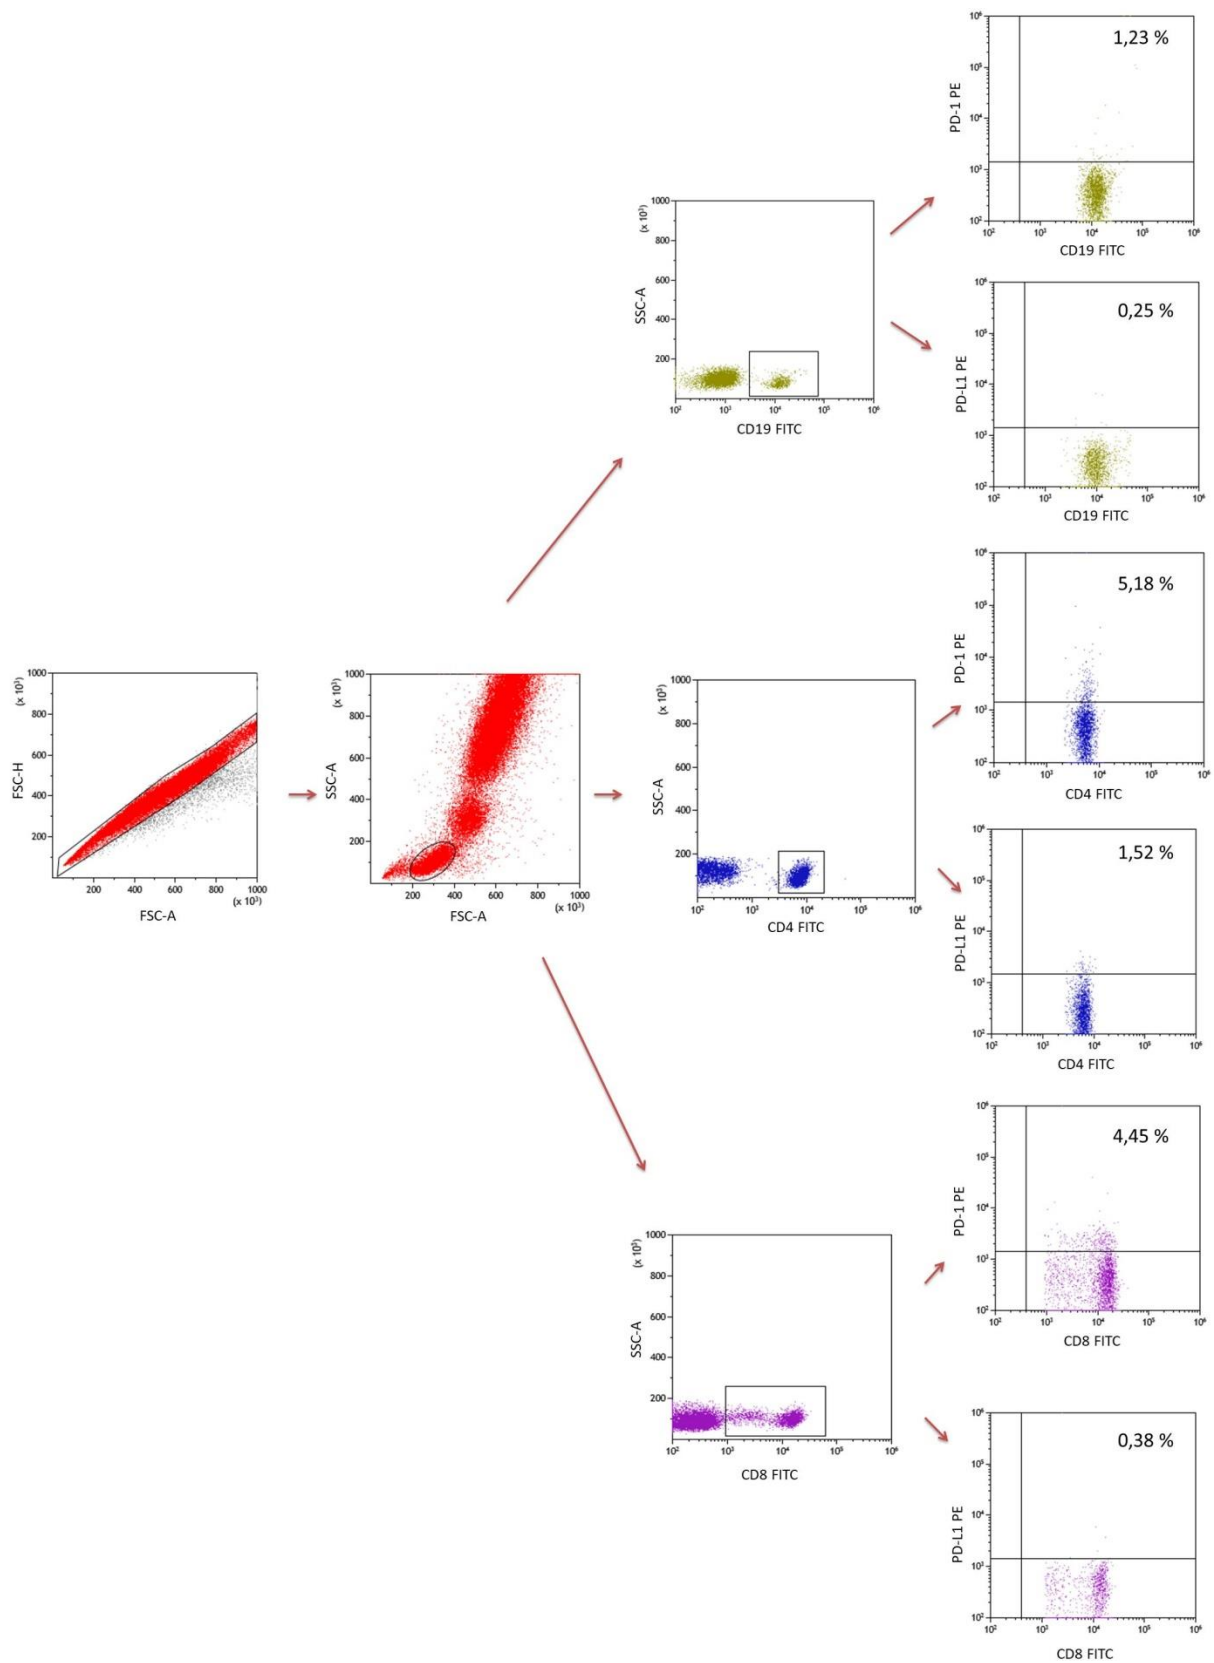

**Figure S2.** Cytometric analysis of PD-1-positive and PD-L1- positive lymphocytes in healthy controls.

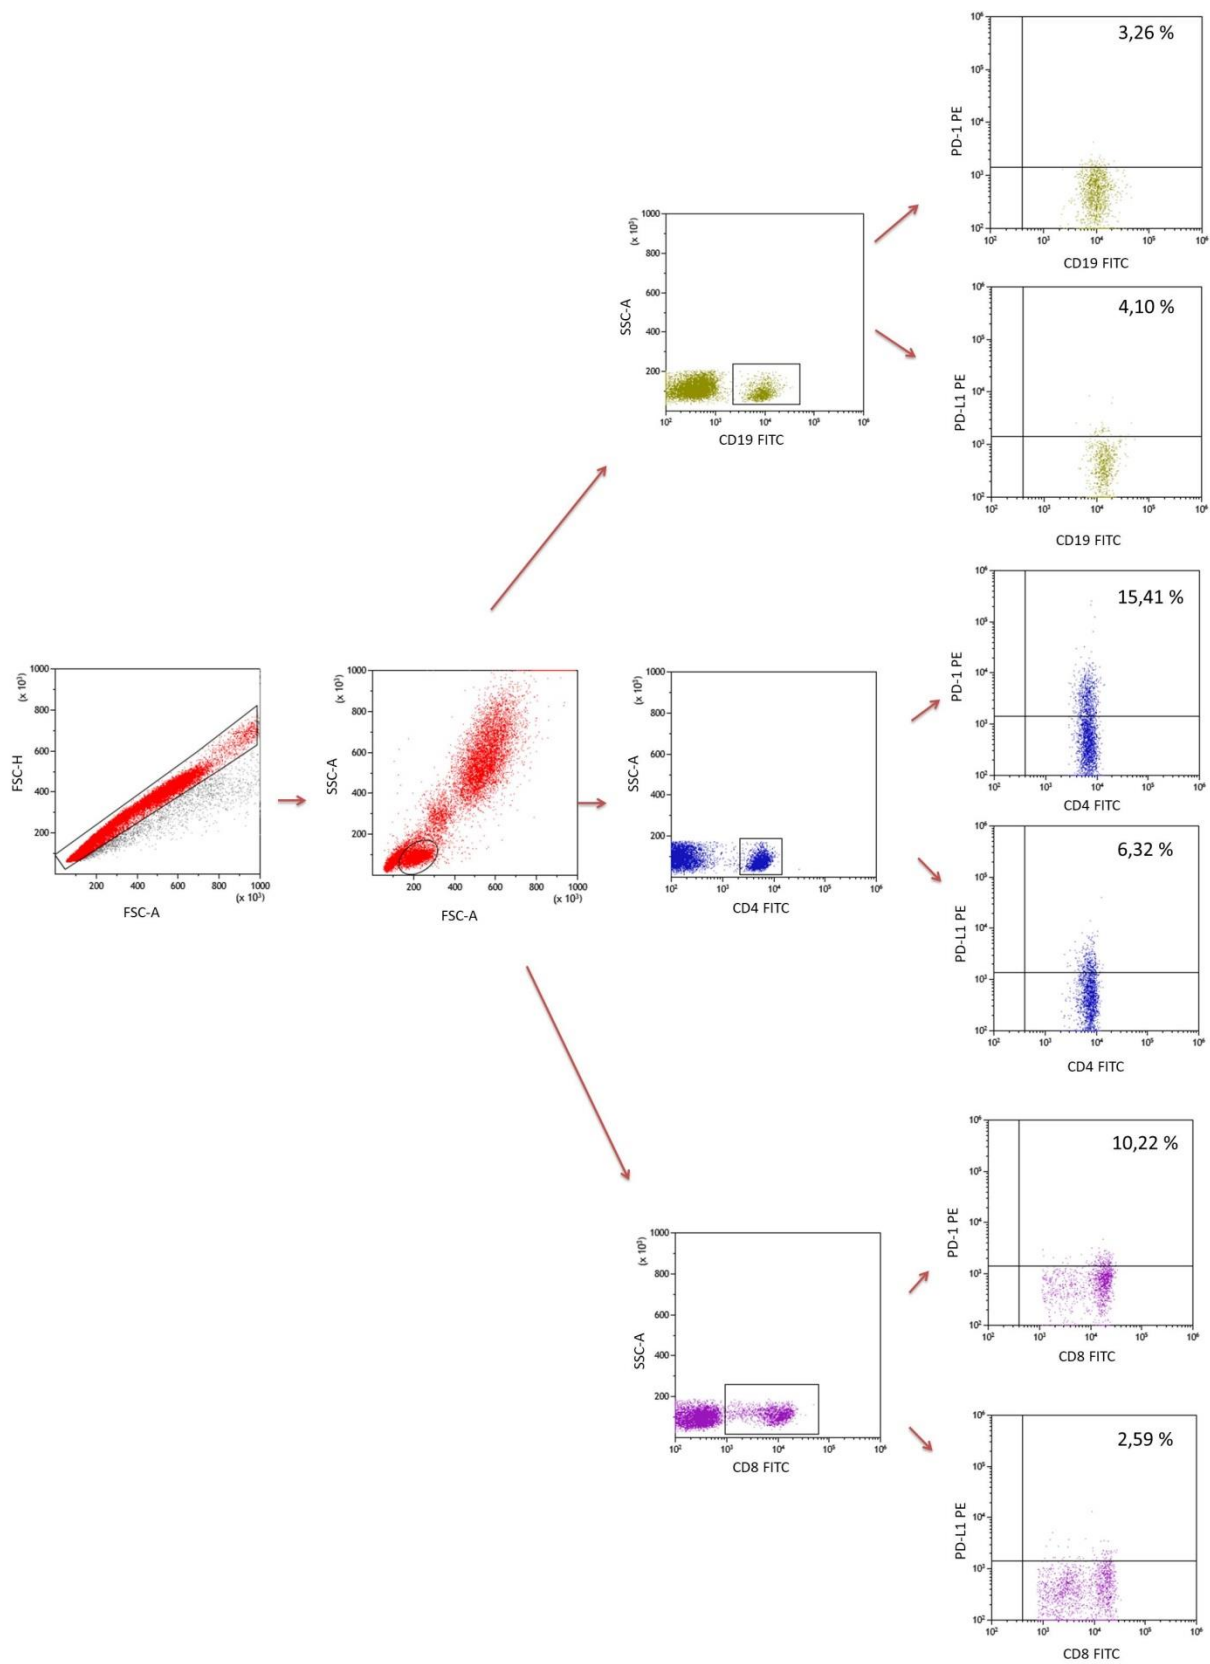

**Figure S3.** Cytometric analysis of PD-1-positive and PD-L1- positive lymphocytes in patients with COVID-19 hospitalized in the non-ICU

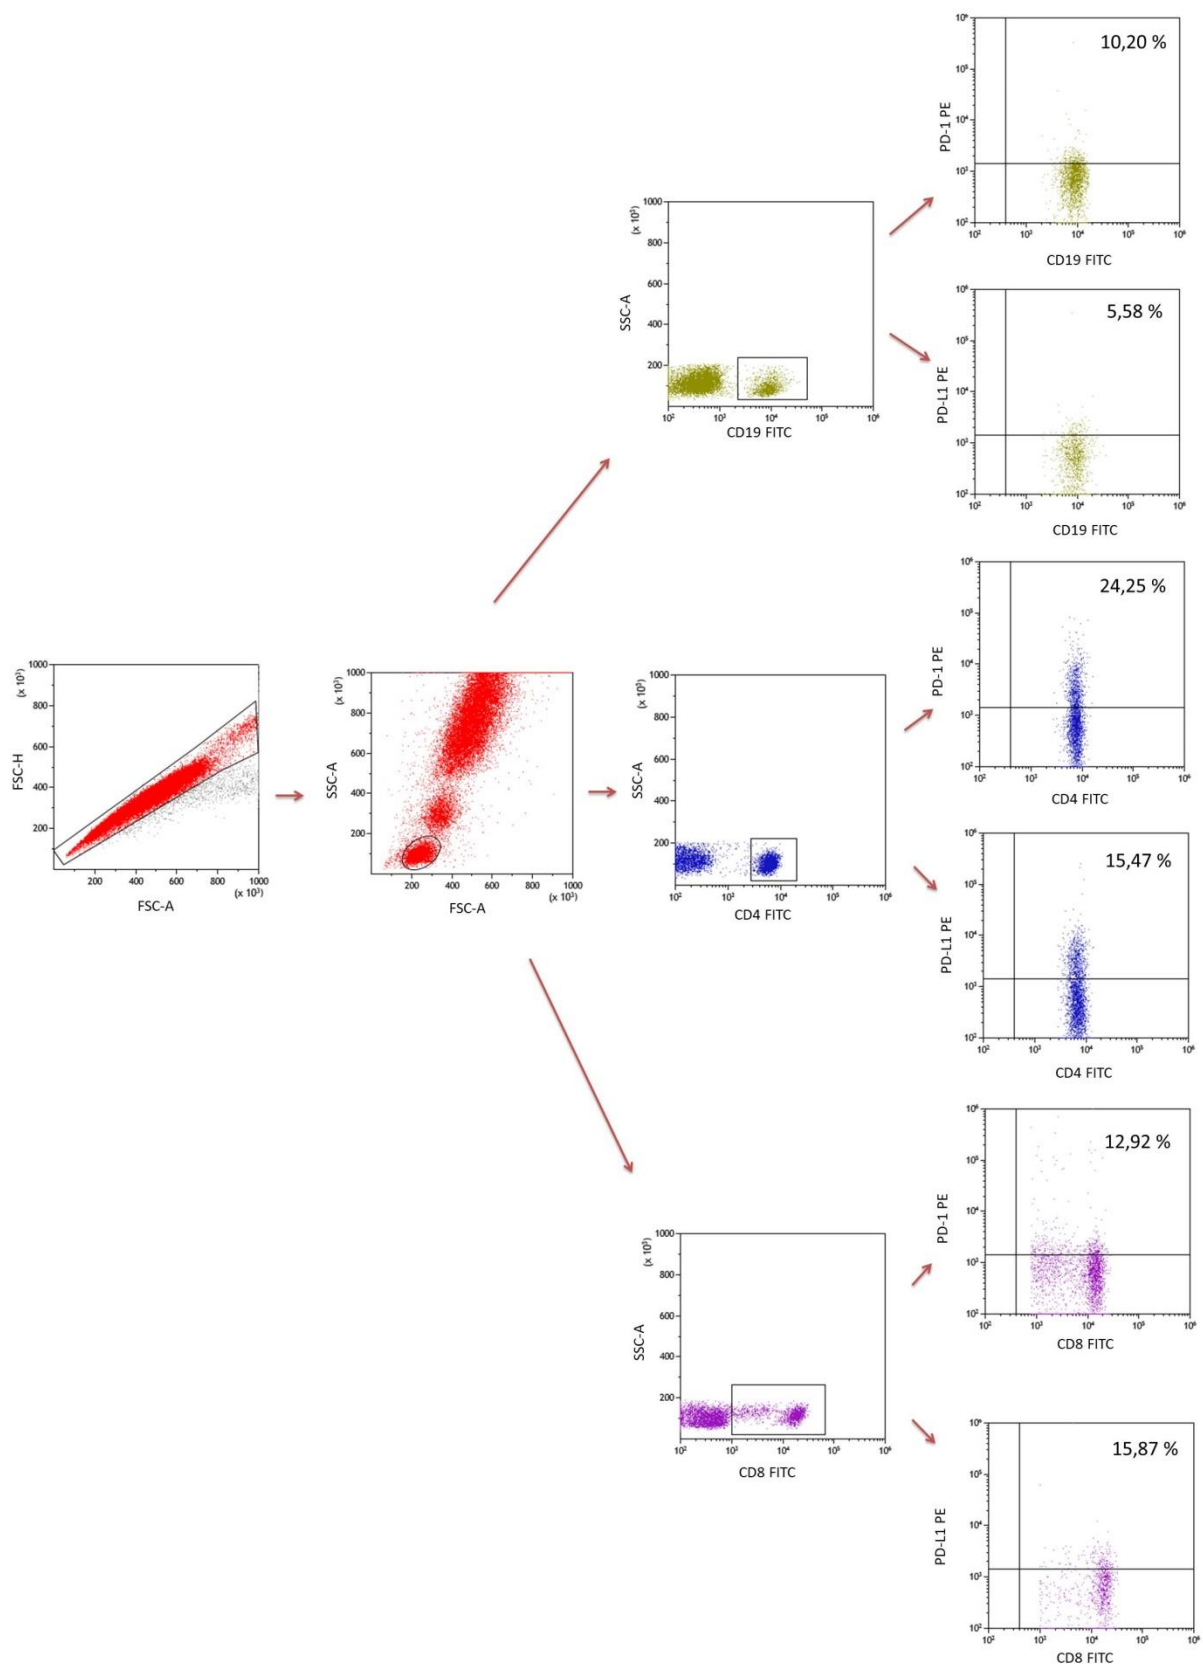

**Figure S4.** Cytometric analysis of PD-1-positive and PD-L1- positive lymphocytes in patients with COVID-19 hospitalized in the ICU

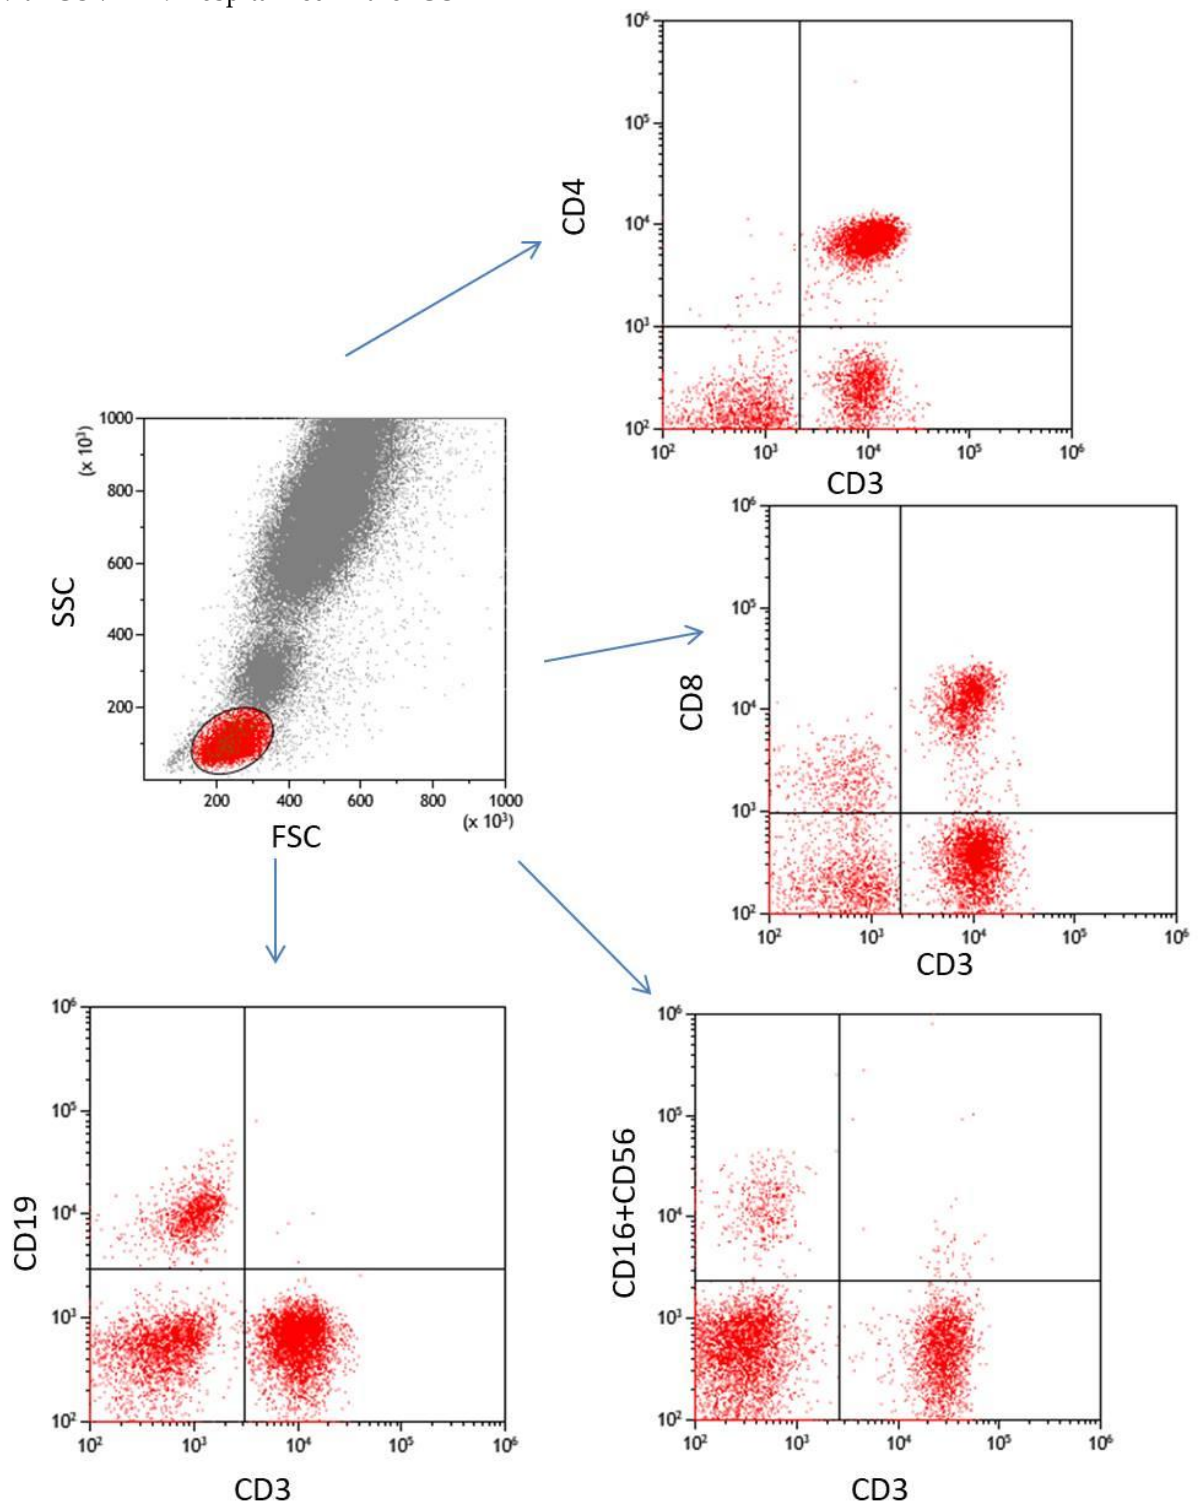

**Figure S5.** Sample analysis of lymphocytes.
